# Supplementary material for: Evaluation of the current guidelines for the management of haemorrhoidal disease using the Appraisal of Guidelines Research and Evaluation II instrument
Source: PubMed Central journal article supplement — Ann Transl Med. 2023 Feb 16;11(6):265. doi: 10.21037/atm-22-4255 (PMC10113081; doi:10.21037/atm-22-4255), 2023-02-16
Supplement: atm-11-06-265-supplementary.pdf [file atm-11-06-265-supplementary.pdf]

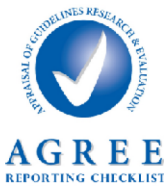

## AGREE Reporting Checklist 2016

This checklist is intended to guide the reporting of clinical practice guidelines.

| CHECKLIST ITEM AND DESCRIPTION                                                                                                                                                                                                                                                                         | REPORTING CRITERIA                                                                                                                                                                                                                                                                                                                                                                                                                                                                                                                                                                 | Page # |
|--------------------------------------------------------------------------------------------------------------------------------------------------------------------------------------------------------------------------------------------------------------------------------------------------------|------------------------------------------------------------------------------------------------------------------------------------------------------------------------------------------------------------------------------------------------------------------------------------------------------------------------------------------------------------------------------------------------------------------------------------------------------------------------------------------------------------------------------------------------------------------------------------|--------|
| <b>DOMAIN 1: SCOPE AND PURPOSE</b>                                                                                                                                                                                                                                                                     |                                                                                                                                                                                                                                                                                                                                                                                                                                                                                                                                                                                    |        |
| <b>1. OBJECTIVES</b><br><i>Report the overall objective(s) of the guideline. The expected health benefits from the guideline are to be specific to the clinical problem or health topic.</i>                                                                                                           | <ul style="list-style-type: none"> <li>✍ Health intent(s) (i.e., prevention, screening, diagnosis, treatment, etc.)</li> <li>✍ Expected benefit(s) or outcome(s)</li> <li>✍ Target(s) (e.g., patient population, society)</li> </ul>                                                                                                                                                                                                                                                                                                                                               |        |
| <b>2. QUESTIONS</b><br><i>Report the health question(s) covered by the guideline, particularly for the key recommendations.</i>                                                                                                                                                                        | <ul style="list-style-type: none"> <li>✍ Target population</li> <li>✍ Intervention(s) or exposure(s)</li> <li>✍ Comparisons (if appropriate)</li> <li>✍ Outcome(s)</li> <li>✍ Health care setting or context</li> </ul>                                                                                                                                                                                                                                                                                                                                                            |        |
| <b>3. POPULATION</b><br><i>Describe the population (i.e., patients, public, etc.) to whom the guideline is meant to apply.</i>                                                                                                                                                                         | <ul style="list-style-type: none"> <li>✍ Target population, sex and age</li> <li>✍ Clinical condition (if relevant)</li> <li>✍ Severity/stage of disease (if relevant)</li> <li>✍ Comorbidities (if relevant)</li> <li>✍ Excluded populations (if relevant)</li> </ul>                                                                                                                                                                                                                                                                                                             |        |
| <b>DOMAIN 2: STAKEHOLDER INVOLVEMENT</b>                                                                                                                                                                                                                                                               |                                                                                                                                                                                                                                                                                                                                                                                                                                                                                                                                                                                    |        |
| <b>4. GROUP MEMBERSHIP</b><br><i>Report all individuals who were involved in the development process. This may include members of the steering group, the research team involved in selecting and reviewing/rating the evidence and individuals involved in formulating the final recommendations.</i> | <ul style="list-style-type: none"> <li>✍ Name of participant</li> <li>✍ Discipline/content expertise (e.g., neurosurgeon, methodologist)</li> <li>✍ Institution (e.g., St. Peter's hospital)</li> <li>✍ Geographical location (e.g., Seattle, WA)</li> <li>✍ A description of the member's role in the guideline development group</li> </ul>                                                                                                                                                                                                                                      |        |
| <b>5. TARGET POPULATION PREFERENCES AND VIEWS</b><br><i>Report how the views and preferences of the target population were sought/considered and what the resulting outcomes were.</i>                                                                                                                 | <ul style="list-style-type: none"> <li>✍ Statement of type of strategy used to capture patients'/publics' views and preferences (e.g., participation in the guideline development group, literature review of values and preferences)</li> <li>✍ Methods by which preferences and views were sought (e.g., evidence from literature, surveys, focus groups)</li> <li>✍ Outcomes/information gathered on patient/public information</li> <li>✍ How the information gathered was used to inform the guideline development process and/or formation of the recommendations</li> </ul> |        |
| <b>6. TARGET USERS</b><br><i>Report the target (or intended) users of the guideline.</i>                                                                                                                                                                                                               | <ul style="list-style-type: none"> <li>✍ The intended guideline audience (e.g. specialists, family physicians, patients, clinical or institutional leaders/administrators)</li> <li>✍ How the guideline may be used by its target audience (e.g., to inform clinical decisions, to inform policy, to inform standards of care)</li> </ul>                                                                                                                                                                                                                                          |        |

Figure S1 AGREE reporting checklist.

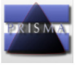

**PRISMA 2009 Flow Diagram**

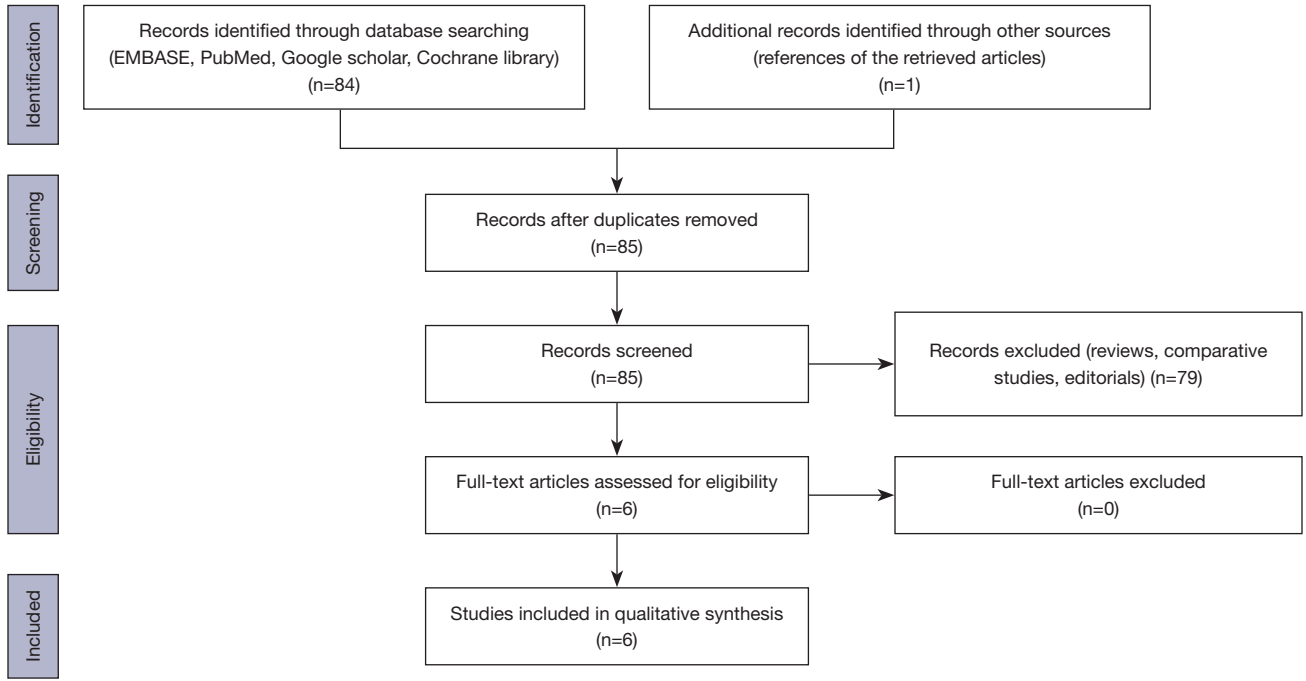

**Figure S2** Flow chart.
